# Supplementary material
Source: PubMed Central journal article supplement (PMC10636673)
Supplement: ajcr0013-4742-f5.pdf [file ajcr0013-4742-f5.pdf]

# FBP1 in lung cancer

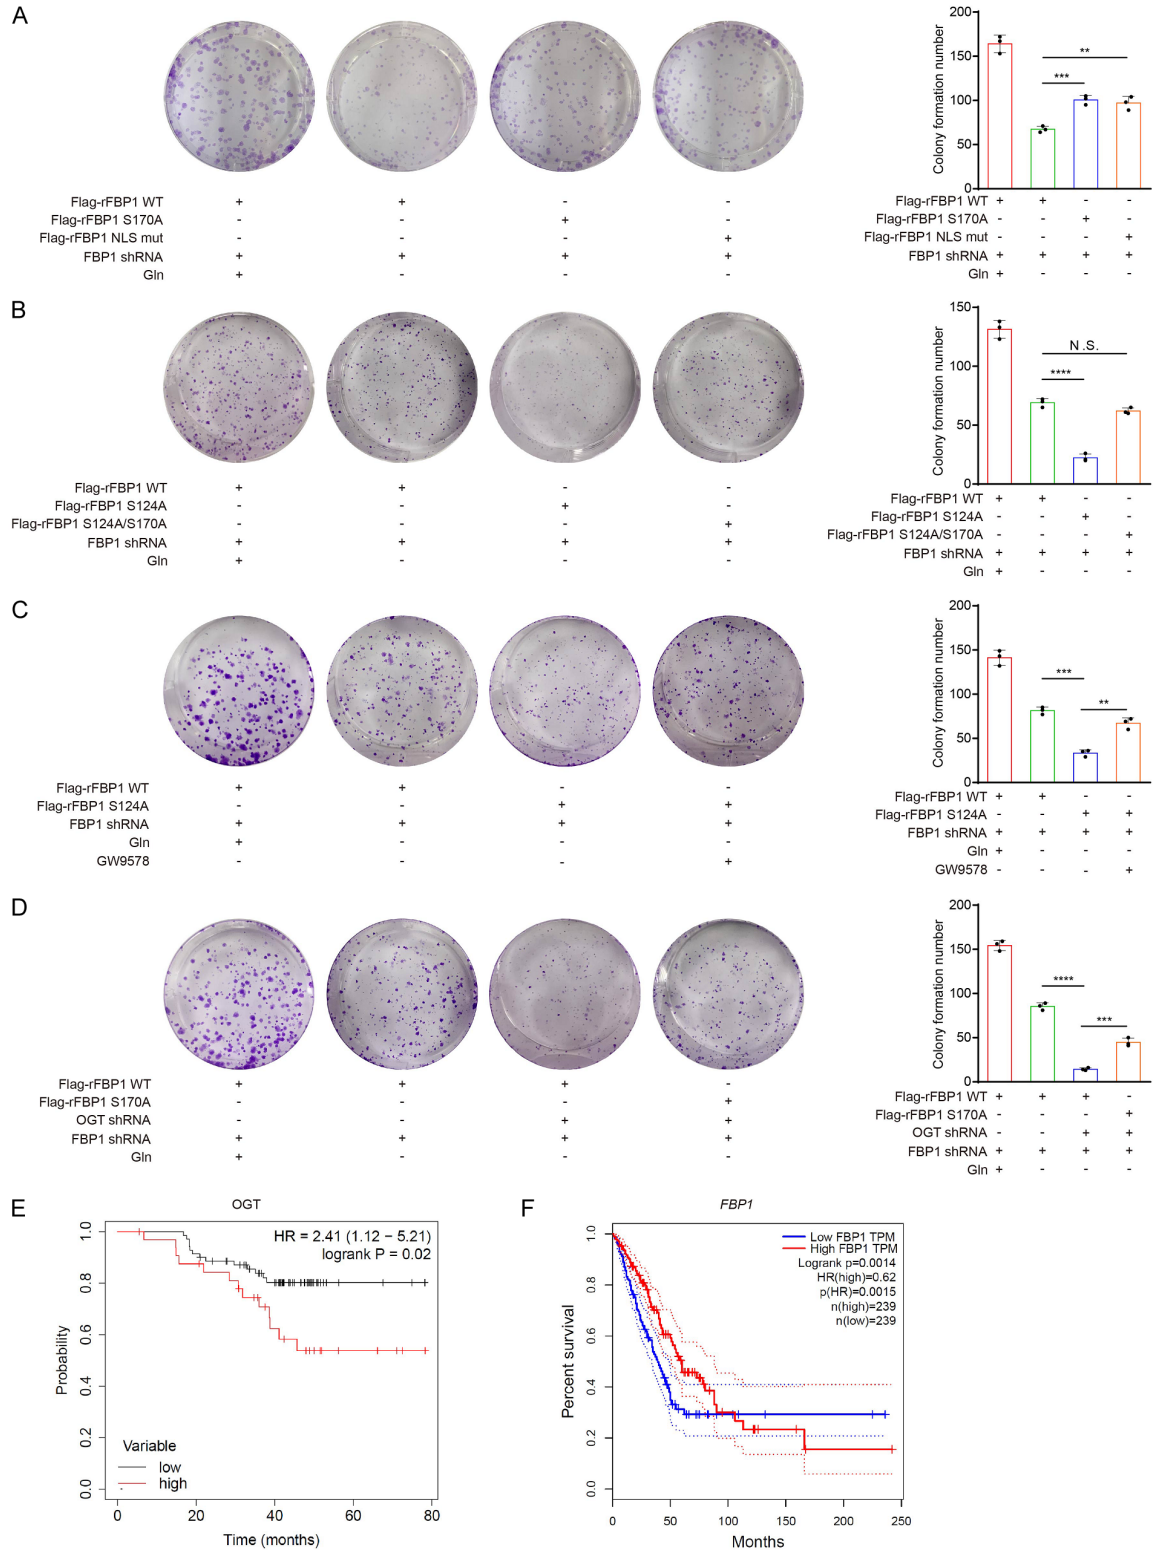

**Figure S1.** A. BEAS-2B cells with depleted endogenous FBP1 and reconstituted expression of the indicated Flag-rFBP1 proteins were treated with or without low concentration of glutamine (0.4 mM). Colony-formation assay was performed. Left: representative images are shown. Right: colony number per well was quantified. Data represent the means  $\pm$  SD of three independent experiments. \* $P < 0.05$ ; \*\* $P < 0.01$ ; \*\*\* $P < 0.001$ ; \*\*\*\* $P < 0.0001$  by two-tailed Student's t test; N.S.: not significant by two-tailed Student's t test. B. A549 cells with depleted endog-

## FBP1 in lung cancer

enous FBP1 and reconstituted expression of the indicated Flag-rFBP1 proteins were seeded treated with or without low concentration of glutamine (0.4 mM). Colony-formation assay was performed. Left: representative images are shown. Right: colony number per well was quantified. Data represent the means  $\pm$  SD of three independent experiments. \*P < 0.05; \*\*P < 0.01; \*\*\*P < 0.001; \*\*\*\*P < 0.0001 by two-tailed Student's t test; N.S.: not significant by two-tailed Student's t test. C. A549 cells with depleted endogenous FBP1 and reconstituted expression of the indicated Flag-rFBP1 proteins were treated with or without low concentration of glutamine (0.4 mM) and GW9578 (100 nM). Colony-formation assay was performed. Left: representative images are shown. Right: colony number per well was quantified. Data represent the means  $\pm$  SD of three independent experiments. \*P < 0.05; \*\*P < 0.01; \*\*\*P < 0.001; \*\*\*\*P < 0.0001 by two-tailed Student's t test; N.S.: not significant by two-tailed Student's t test. D. A549 cells with depleted endogenous FBP1 and reconstituted expression of the indicated Flag-rFBP1 proteins with or without OGT shRNA expression were treated with or without low concentration of glutamine (0.4 mM). Colony-formation assay was performed. Left: representative images are shown. Right: colony number per well was quantified. Data represent the means  $\pm$  SD of three independent experiments. \*P < 0.05; \*\*P < 0.01; \*\*\*P < 0.001; \*\*\*\*P < 0.0001 by two-tailed Student's t test; N.S.: not significant by two-tailed Student's t test. E. Analysis of the protein levels of OGT and the prognosis of LUAD patients was performed. F. Analysis of the mRNA levels of *FBP1* and the prognosis of LUAD was performed based on TCGA database (<http://gepia.cancer-pku.cn/>).
